# Supplementary material for: The effects of demographic stochasticity and parameter uncertainty on predicting the establishment of introduced species
Source: PubMed Central journal article supplement (PMC5167034; doi:10.1002/ece3.2495), 2016-10-27

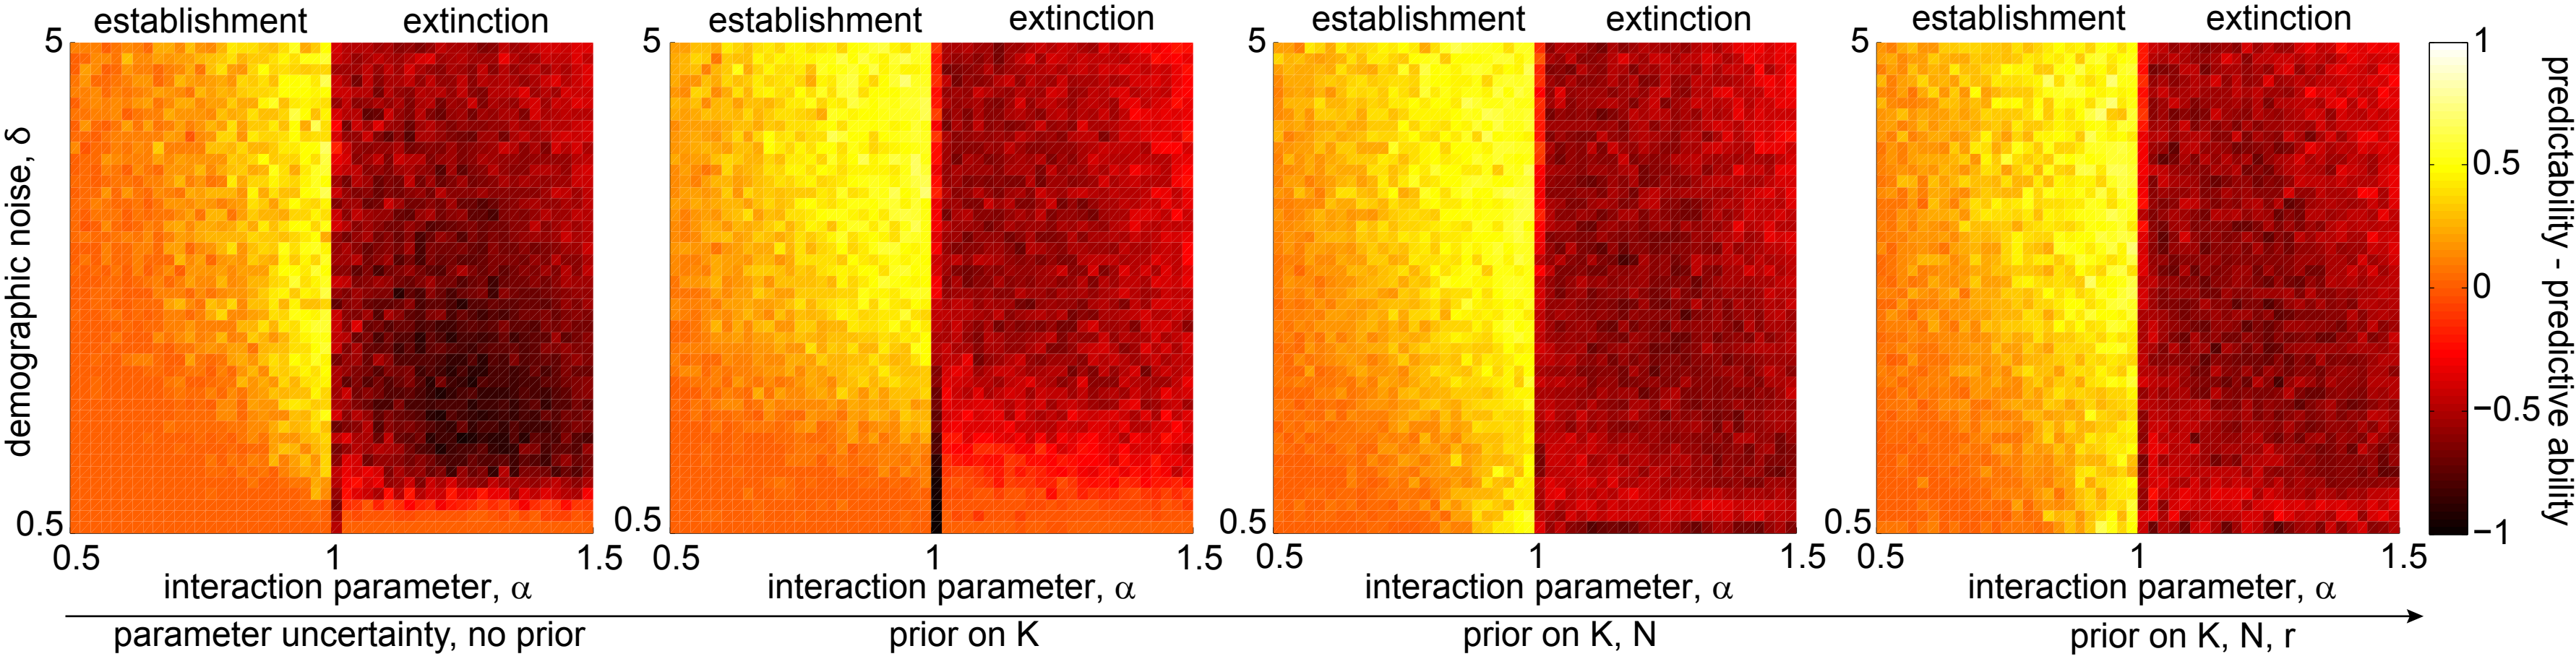

Supplement: ECE3-6-8440-s001.pdf [file ECE3-6-8440-s001.pdf]
